# Supplementary material for: Brain-penetrating neurotrophic factor mimetics: HER-096 as a disease-modifying therapy for Parkinson’s disease
Source: PubMed Central journal article supplement — Neural Regen Res. 2024 May 17;20(4):1094–5. doi: 10.4103/NRR.NRR-D-24-00187 (PMC11438334; doi:10.4103/nrr.nrr-d-24-00187), 2024-05-17
Supplement: NRR-20-1094_Suppl1.pdf [file NRR-20-1094_Suppl1.pdf]

## OPEN PEER REVIEW REPORT 1

**Name of journal:** Neural Regeneration Research

**Manuscript NO:** NRR-D-24-00187

**Title:** Brain-penetrating neurotrophic factor mimetics: HER-096 as a disease-modifying therapy for Parkinson's disease and other neurodegenerative diseases

**Reviewer's Name:** Giulia Di Lazzaro

**Reviewer's country:** Italy

### COMMENTS TO AUTHORS

"Brain-penetrating neurotrophic factor mimetics: HER-096 as a disease-modifying therapy for Parkinson's disease and other neurodegenerative diseases" is a nicely written and concise perspective on one novel therapeutic approach in PD, among the many under investigation.

The paper is well written and presents the most relevant literature. However, seen the "perspective" nature of the manuscript, I would suggest:

- to include a critical paragraph on which could be the possible adverse events or complications related to HER-096 (e.g. non-selectivity of the targets, possible toxicity over time?)
- to include a paragraph debating if tis component is more promising with respect to other and why.
